# Supplementary material for: Local human movement patterns and land use impact exposure to zoonotic malaria in Malaysian Borneo
Source: eLife journal article supplement (doi:10.7554/elife.47602), 2019-10-22
Supplement: supp [file elife-47602-supp-v1.zip]

Archive with 4 entries (4 files):
- elife_poa_e47602_Supplementary_file_2.docx
- elife_poa_e47602_Supplementary_file_1.docx
- elife_poa_e47602_Transparent_Reporting_File.pdf
- elife_poa_e47602_Source_code_1.zip
